# Supplementary material for: Trajectories of maternal ante- and postpartum depressive symptoms and their association with child- and mother-related characteristics in a West African birth cohort study
Source: PLoS One. 2017 Nov 6;12(11):e0187267. doi: 10.1371/journal.pone.0187267 (PMC5673167; doi:10.1371/journal.pone.0187267)
Supplement: S2 Table — (DOCX) [file pone.0187267.s002.docx]

# Supporting Information

# Trajectories of maternal ante- and postpartum depressive symptoms and their association with child- and mother-related characteristics in a West African birth cohort study

Dana Barthel1,2*, Levente Kriston3, Daniel Fordjour4, Yasmin Mohammed4, Kra Yao Esther Doris5, Bony Kotchi Carine Esther6, Koffi Ekissi Jean Armel6, Kirsten Alexandra Eberhardt1, Torsten Feldt1,7, Rebecca Hinz1,8, Mathurin Koffi9, Stefanie Schoppen1, Carola Bindt2¶, Stephan Ehrhardt1,10¶, on behalf of the International CDS Study Group^

**S2 Table.** Sample characteristics regarding predictor variables used in the multinomial logistic regression analysis

| **Variable** | **Total (*N*=650)** | **CIV (*n*=362)** | **GHA (*n*=288)** |
| --- | --- | --- | --- |
| **Psychosocial factors** |  |  |  |
| Anxiety symptoms1, a  *M* (*SD*; range) | 5.1 (3.8; 0 to 21) | 5.4 (3.8; 0 to 18) | 4.7 (3.8; 0 to 21) |
| Disability1, b  *M* (*SD*; range) | 24.4 (7.0; 12 to 48) | 23.7 (7.1; 12 to 45) | 25.2 (6.8; 12 to 43) |
| Partner support3, c  *M* (*SD*; range) | 4.6 (1.8; 0 to 6) | 4.4 (1.9; 0 to 6) | 4.9 (1.8; 0 to 6) |
| Mother support3, c  *M* (*SD*; range) | 4.4 (2.1; 0 to 6) | 4.5 (2.0; 0 to 6) | 4.3 (2.2; 0 to 6) |
| Economic stress3, d  *M* (*SD*; range) | 0.9 (1.0; 0 to 3) | 0.9 (1.0; 0 to 3) | 0.9 (1.0; 0 to 3) |
| Marital stress3, e  *M* (*SD*; range) | 0.2 (0.5; 0 to 2) | 0.3 (0.6; 0 to 2) | 0.1 (0.4; 0 to 2) |
| Family stress3, e  *M* (*SD*; range) | 0.8 (0.8; 0 to 2) | 0.9 (0.8; 0 to 2) | 0.8 (0.74; 0 to 2) |
| Experience of violence3, e  *M* (*SD*; range) | 0.2 (0.5; 0 to 2) | 0.1 (0.3; 0 to 2) | 0.2 (0.6; 0 to 2) |
| **Sociodemographic factors** |  |  |  |
| Age of woman in years1  *M* (*SD*; range) | 29.2 (5.4; 18 to 46) | 28.7 (5.8; 18 to 46) | 29.8 (4.8; 18 to 42) |
| SES1, f *n* (%)  Low  High | 287 (45.0)  351 (55.0) | 248 (69.9)  107 (30.1) | 39 (13.8)  244 (86.2) |
| Educational experience1, h *n* (%)  0  1 | 355 (54.7)  294 (45.3) | 244 (67.4)  118 (32.6) | 111 (38.7)  176 (61.3) |
| Marital status1, j *n* (%)  0  1 | 63 (9.7)  587 (90.3) | 50 (13.8)  312 (86.2) | 13 (4.5)  275 (95.5) |
| Number of children from relatives or acquaintances living in household3  *M* (*SD*; range) | 0.6 (1.1; 0 to 7) | 1.0 (1.3; 0 to 7) | 0.08 (0.3; 0 to 2) |
| **Obstetric factors** |  |  |  |
| Gestational age in weeks2  *M* (*SD*; range) | 39.7 (1.5; 35 to 43) | 39.7 (1.6; 35 to 43) | 39.7 (1.3; 36 to 43) |
| Apgar score after 1 minute (dichotomized)2, k *n* (%)  Medium  High | 519 (79.8)  131 (20.2) | 237 (65.5)  125 (34.5) | 282 (97.9)  6 (2.1) |
| Sex of child2 *n* (%)  Female  Male | 326 (50.2)  324 (49.8) | 166 (45.9)  196 (54.1) | 160 (55.6)  128 (44.4) |
| Weight of child in kg2  *M* (*SD*; range) | 3.2 (0.4; 2.5 to 4.9) | 3.1 (0.4; 2.5 to 4.9) | 3.2 (0.4; 2.5 to 4.9) |
| Caesarian section current birth2 *n* (%)  Yes  No | 122 (18.8)  526 (80.9) | 26 (7.2)  334 (92.8) | 96 (33.3)  192 (66.7) |
| Number of pregnancies before inclusion1 *n* (%)  First  Second  Third  Fourth  Fifth or more | 172 (27.1)  132 (20.8)  116 (18.3)  79 (12.4)  136 (21.4) | 92 (26.4)  63 (18.1)  68 (19.5)  41 (11.7)  85 (24.3) | 80 (28.0)  69 (24.1)  48 (16.8)  38 (13.3)  51 (17.7) |
| Pregnancy complications before inclusion1 *n* (%)  Yes  No | 158 (25.2)  470 (74.8) | 65 (18.1)  294 (81.9) | 93 (34.6)  176 (65.4) |
| Caesarian section before inclusion1 *n* (%)  Yes  No | 77 (12.6)  536 (87.4) | 22 (6.5)  319 (93.5) | 55 (20.2)  217 (79.8) |
| Mother pregnant since last birth3 *n* (%)  Yes  No | 94 (20.1)  374 (79.9) | 44 (16.2)  227 (83.8) | 50 (25.4)  147 (74.6) |
| Health care utilization3  *M* (*SD*; range) | 3.6 (3.1; 0 to 16) | 4.0 (3.0; 0 to 15) | 3.2 (3.2; 0 to 16) |

1 assessed at inclusion; 2 assessed at birth; 3 assessed 2 years after birth

a GAD-7 sum score: range from 0 to 21; higher scores represent higher level of anxiety symptoms.

b WHO-DAS II sum score: range from 12 to 60; higher scores represent higher level of disability.

c Range from 0 to 6; 3 items answered on a three point scale; higher scores represent higher level of support.

d Range from 0 to 3; 3 items with a dichotomous response format (0 = no; 1 = yes); higher scores represent higher level of stress.

e Range from 0 to 2; 2 items with a dichotomous response format (0 = no; 1 = yes); higher scores represent higher level of stress.

f SES: The median was used to differentiate between low (0) and high (1).

h dichotomized: 0 = none formal education and primary education; 1 = secondary education and tertiary education

j dichotomized: 0 = never married, separated, divorced, or widowed; 1 = currently married or cohabiting

k Apgar score after 1 minute: dichotomized: 0 = 5 to 8; 1 = 9 to 10.
